# Supplementary material for: Gender and age-specific aspects of awareness and knowledge in basic life support
Source: PubMed Central journal article supplement (PMC5997304; doi:10.1371/journal.pone.0198918), 2018-06-12
Supplement: pone.0198918.s002.pdf [file pone.0198918.s002.pdf]

# Questionnaire

Participant ID: .....

## **Knowledge in BLS and AED use**

---

**F1 Have you ever attended a first-aid course?**

- Yes
- No

**F2 Do you feel confident to perform resuscitation attempts on a person with cardiac arrest?**

- Yes
- No
- Not sure

**F3 Do you think it is important that people not having any medical background are able to perform resuscitative attempts?**

- Yes
- No
- Not sure

**F4 Would you perform resuscitative attempts on a foreign person in public that presents with cardiac arrest?**

- Yes
- No
- Not sure

**F5 Would you use a defibrillator on a foreign person in public that presents with cardiac arrest?**

- Yes
- No
- Not sure

***Hereinafter, I will ask some questions about cardiac arrest. For each question, four possible answers are given. Please note that only one answer is correct. Please select the right one.***

**F6 What is the next step if a person is unresponsive and does not react on shaking his shoulders?**

- Place person in the recovery position
- Check if person is breathing normally
- Place person with elevated legs (shock position)
- Check mouth cavity for foreign objects

**F7 What does a person with cardiac arrest benefit the most from?**

- Chest compressions
- Place person in the recovery position
- Rescue breaths
- Place person with elevated legs (shock position)

**F8 Do you know what the device is called by which you can save a person's life with an electric impulse (shock)?**

- Defibrillator / AED
- ECG
- X-ray machine
- Stethoscope

**F9 Do you know who is allowed to use an automated external defibrillator (AED)?**

- Everyone
- Only paramedics and doctors
- Doctors with additional training
- Everyone who attended at least one first-aid course

**F10 Do you know the colour of the sign that indicates the location of a defibrillator in public places?**

- Green
- Red
- Blue
- Black

**Demographics**

---

**P1 Age:** ..... years

**P2 Gender**

- Male
- Female

**P3 Highest educational attainment**

- Compulsory school
- High school
- School leaving examination
- University, Technical College

**P4 Are you an Austrian Citizen?**

- Yes, since birth
- Yes, naturalized
- No
