# Supplementary material for: Gender and age-specific aspects of awareness and knowledge in basic life support
Source: PLoS One. 2018 Jun 12;13(6):e0198918. doi: 10.1371/journal.pone.0198918 (PMC5997304; doi:10.1371/journal.pone.0198918)
Supplement: S1 File — (PDF) [file pone.0198918.s001.pdf]

# Fragebogen

Teilnehmer ID: .....

## **Wissen zum BLS und Defibrillator**

---

**F1 Haben Sie schon einmal einen Erste-Hilfe Kurs besucht?**

- ☐ Ja
- ☐ Nein

**F2 Trauen Sie es sich zu, einen Menschen bei einem Atem-Kreislauf-Stillstand wiederzubeleben?**

- ☐ Ja
- ☐ Nein
- ☐ Unsicher

**F3 Ist es aus ihrer Sicht wichtig, dass Personen ohne eine medizinische Ausbildung eine Wiederbelebung bei einem Atem-Kreislauf-Stillstand durchführen können?**

- ☐ Ja
- ☐ Nein
- ☐ Unsicher

**F4 Würden Sie versuchen einen Fremden mit Atem-Kreislauf-Stillstand in der Öffentlichkeit wiederzubeleben?**

- ☐ Ja
- ☐ Nein
- ☐ Unsicher

**F5 Würden Sie an einem Fremden mit Atem-Kreislauf-Stillstand in der Öffentlichkeit einen Defibrillator anwenden?**

- ☐ Ja
- ☐ Nein
- ☐ Unsicher

***Ich stelle Ihnen nun einige Fragen zum Thema Atem-Kreislauf-Stillstand. Zu jeder Frage lese ich Ihnen vier Antwortmöglichkeiten vor. Bitte wählen Sie aus den vier Antwortmöglichkeiten die Antwortmöglichkeit aus, welche aus Ihrer Sicht richtig ist.***

**F6 Was macht man als nächstes, wenn ein Mensch auf Ansprechen und Schütteln der Schultern nicht reagiert?**

- ☐ Lagerung in stabiler Seitenlage
- ☐ Atemkontrolle
- ☐ Lagerung mit erhöhten Beinen ("Schocklagerung")
- ☐ Die Mundhöhle auf Fremdkörper kontrollieren

**F7 Was hilft einem Menschen mit Atem-Kreislauf-Stillstand am meisten?**

- ☐ Herzdruckmassage
- ☐ Lagerung in stabiler Seitenlage
- ☐ Beatmung
- ☐ Lagerung mit erhöhten Beinen ("Schocklagerung")

**F8 Wissen Sie wie das Gerät heißt, mit dem man einem Menschen mittels eines Stromimpulses (Schock) das Leben retten kann?**

- ☐ Defibrillator / Defi
- ☐ EKG
- ☐ Röntgengerät
- ☐ Stethoskop

**F9 Wissen Sie wer einen Defibrillator / Defi bedienen darf?**

- ☐ Ausnahmslos jeder
- ☐ Nur Sanitäter und Ärzte
- ☐ Ärzte mit Zusatzausbildung
- ☐ Personen, die zumindest einen Erste-Hilfe Kurs besucht haben

**F10 Wissen Sie welche Farbe das Defi-Zeichen hat?**

- ☐ Grün
- ☐ Rot
- ☐ Blau
- ☐ Schwarz

## **Demographie**

---

**P1 Alter:** ..... Jahre

**P2 Geschlecht**

- ☐ Mann
- ☐ Frau

**P3 Höchste abgeschlossene Schulbildung**

- ☐ Pflichtschule
- ☐ Lehre, Fachschule ohne Matura
- ☐ Matura
- ☐ Universität, (Fach-) Hochschule

**P4 Besitzen Sie die österreichische Staatsbürgerschaft?**

- ☐ Ja, seit der Geburt.
- ☐ Ja, eingebürgert.
- ☐ Nein
